# Supplementary material for: Truncated PPM1D Prevents Apoptosis in the Murine Thymus and Promotes Ionizing Radiation-Induced Lymphoma
Source: Cells. 2020 Sep 10;9(9):2068. doi: 10.3390/cells9092068 (PMC7565556; doi:10.3390/cells9092068)
Supplement: Supplementary file 1 [file cells-09-02068-s001.pdf]

# Truncated PPM1D prevents apoptosis in murine thymus and promotes ionizing radiation-induced lymphoma

Andra S. Martinikova<sup>1,2,#</sup>, Monika Burocziova<sup>1,#</sup>, Miroslav Stoyanov, Libor Macurek<sup>1</sup>

<sup>1</sup> Laboratory of Cancer Cell Biology, Institute of Molecular Genetics of the Czech Academy of Sciences, Prague, Czech Republic

<sup>2</sup> Department of Developmental and Cell Biology, Faculty of Science, Charles University, Prague, Czech Republic

Supplementary file containing Figures 1-4

**A**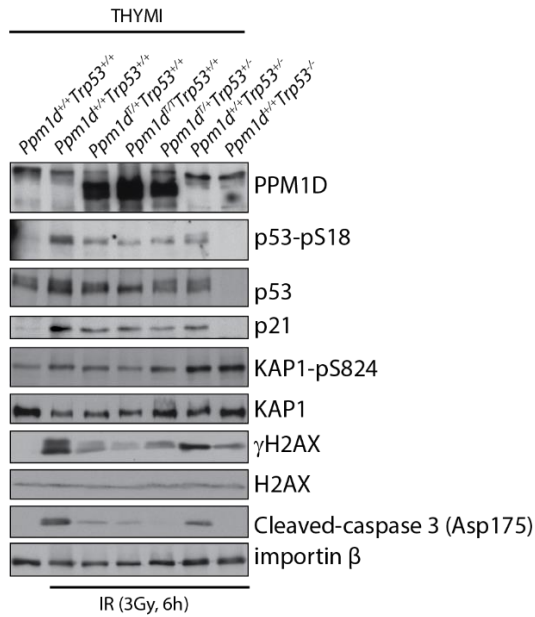**B**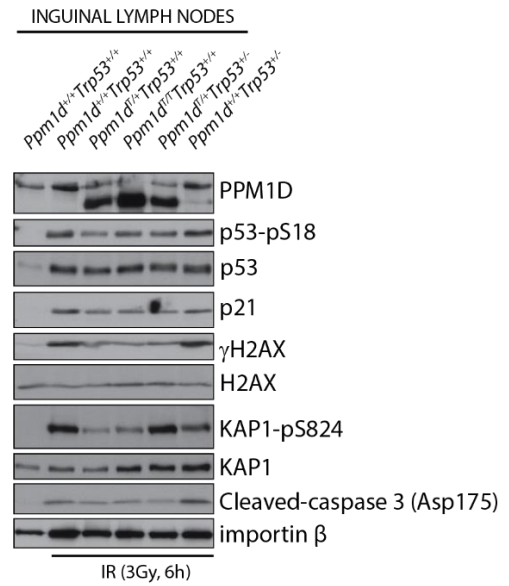**C**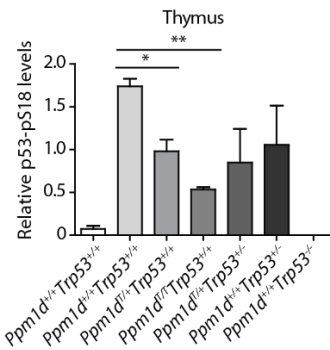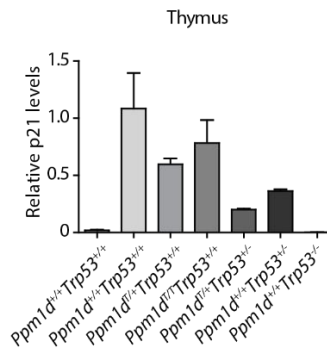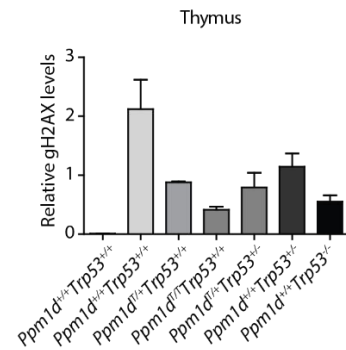**D**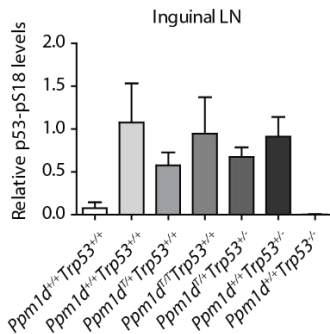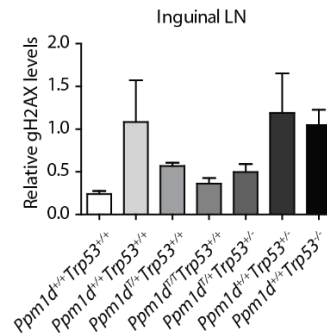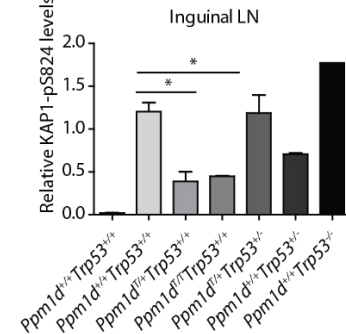

### Suppl. Figure S1. Truncated PPM1D impairs DNA damage response

- (A) Mice of indicated genotypes were exposed or not to 3 Gy of IR and proteins in the thymi were analyzed after 6 h by immunoblotting. Independent biological replicate of the experiment shown in Fig. 1 F.
- (B) Mice of indicated genotypes were exposed or not to 3 Gy of IR and proteins in the inguinal lymph nodes were analyzed after 6 h by immunoblotting. Independent biological replicate of the experiment shown in Fig. 1 G.
- (C) Quantification of signal intensity of protein levels in the thymi. Signal was normalized to importin β, (n=3).
- (D) Quantification of signal intensity of protein levels in the lymph nodes. Signal was normalized to importin β, (n=3).

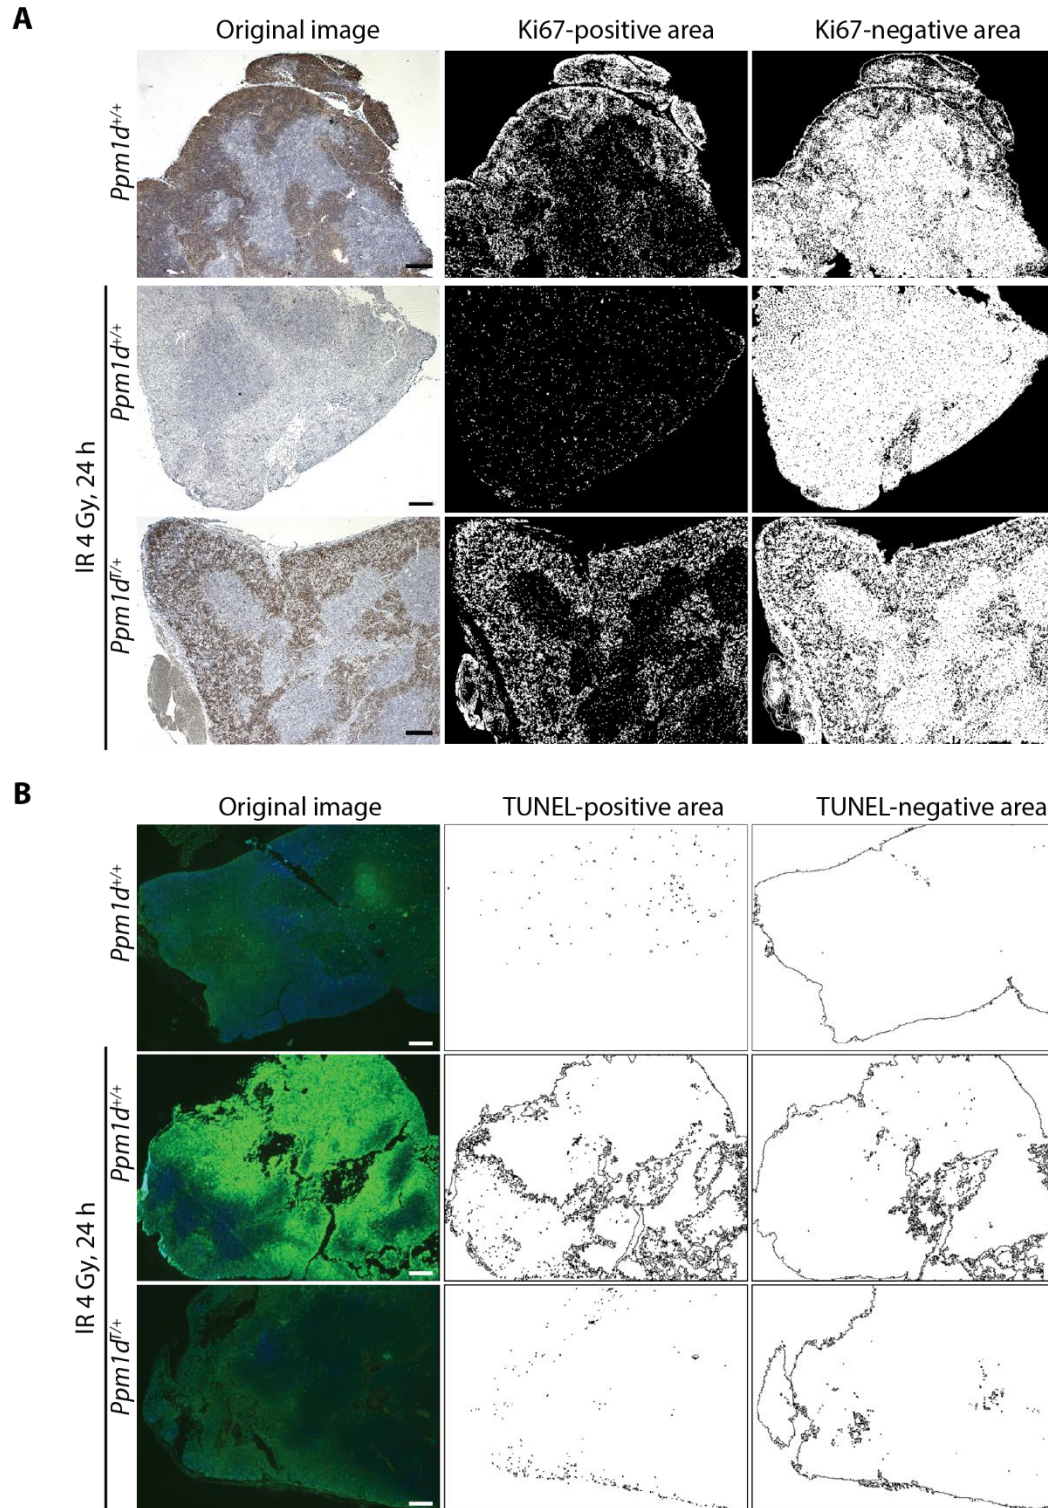

**Suppl. Figure S2. Image thresholding for quantification of proliferation and apoptosis in thymus**

- (A) A representative example of the image thresholding for the proliferation marker Ki-67 positive and negative signal from Fig 2 B. Scale bars indicate 200  $\mu$ m.
- (B) A representative example of the image thresholding for the apoptosis marker TUNEL positive and negative signal from Fig 2 D. Scale bars indicate 200  $\mu$ m.

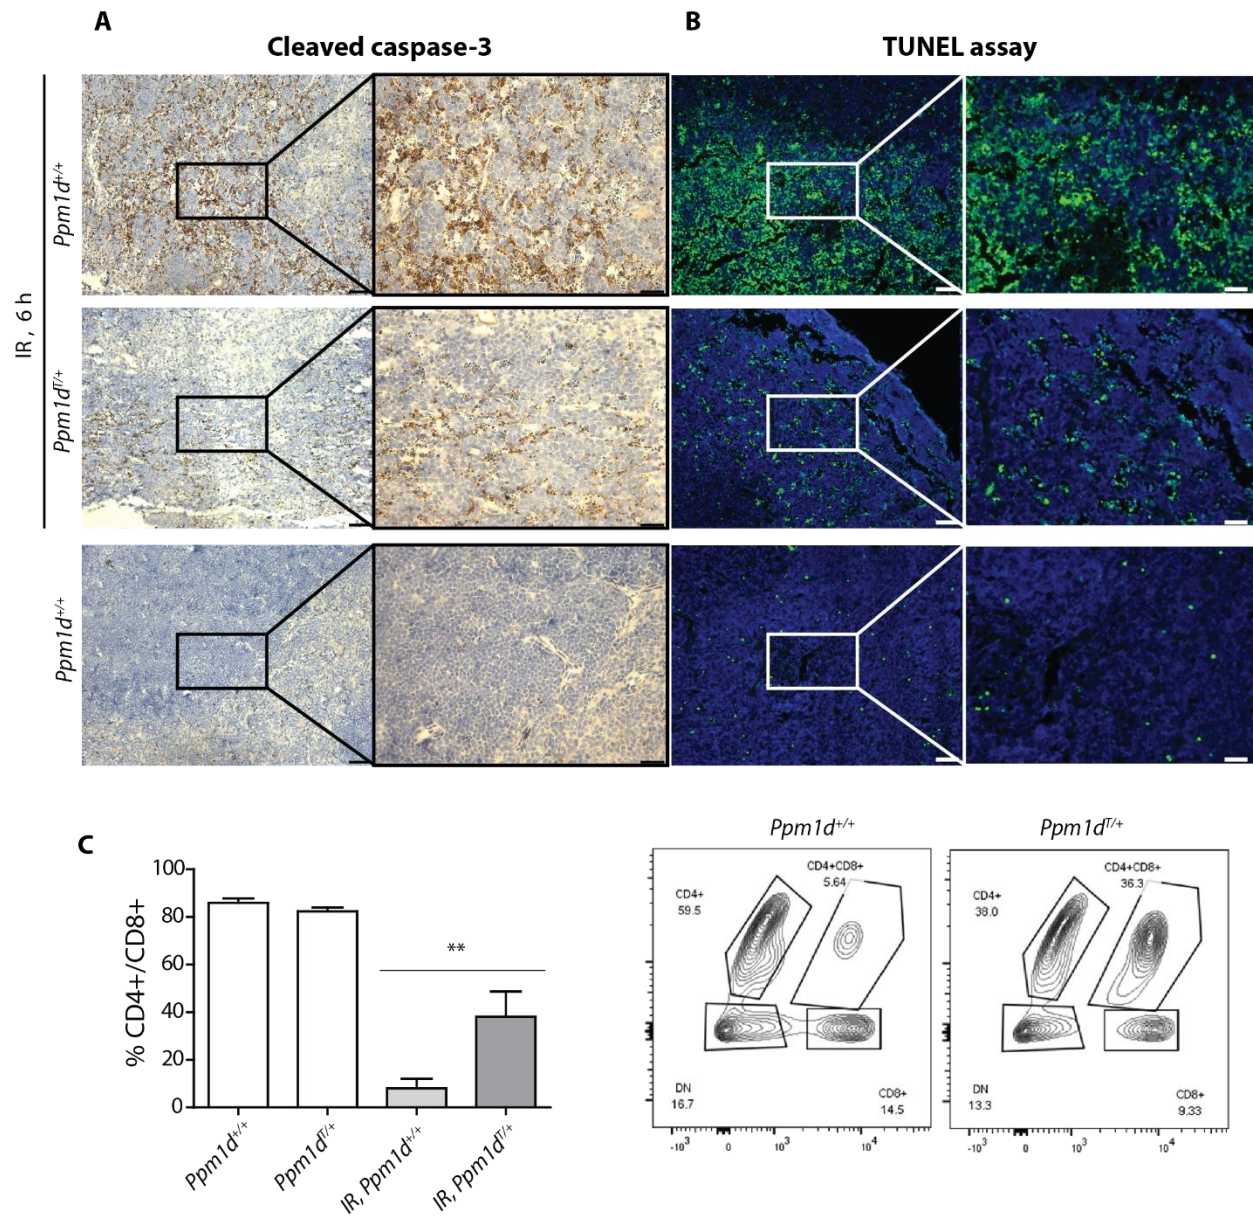

**Suppl. Figure S3. Truncated PPM1D prevents activation of caspase 3 after genotoxic stress.**

(A) Wild-type and *Ppm1d*<sup>fl/+</sup> mice were sacrificed 6 h after exposure to mock or to ionizing radiation and analyzed by immunohistochemistry. Sections were probed using an antibody against cleaved caspase-3 Asp175. Magnification 20X and 40X, bars indicate 50  $\mu$ m and 25  $\mu$ m, respectively. Representative images are shown.

(B) Histology sections of thymi from A were subjected to TUNEL assay. Magnification 20X and 40X, bars indicate 50  $\mu$ m and 25  $\mu$ m, respectively.

(C) Wild-type and *Ppm1d*<sup>fl/+</sup> mice were sacrificed 24 h after exposure to mock or to ionizing radiation and population of double-positive CD4+/CD8+ cells was quantified in the thymi using flow cytometry. Representative plot (right panels) and quantification (left panel) is shown. Statistical significance was evaluated by a two-tailed t-test (n=3). Note high difference in the amount of CD4+/CD8+ population between the two genotypes after exposure to IR.

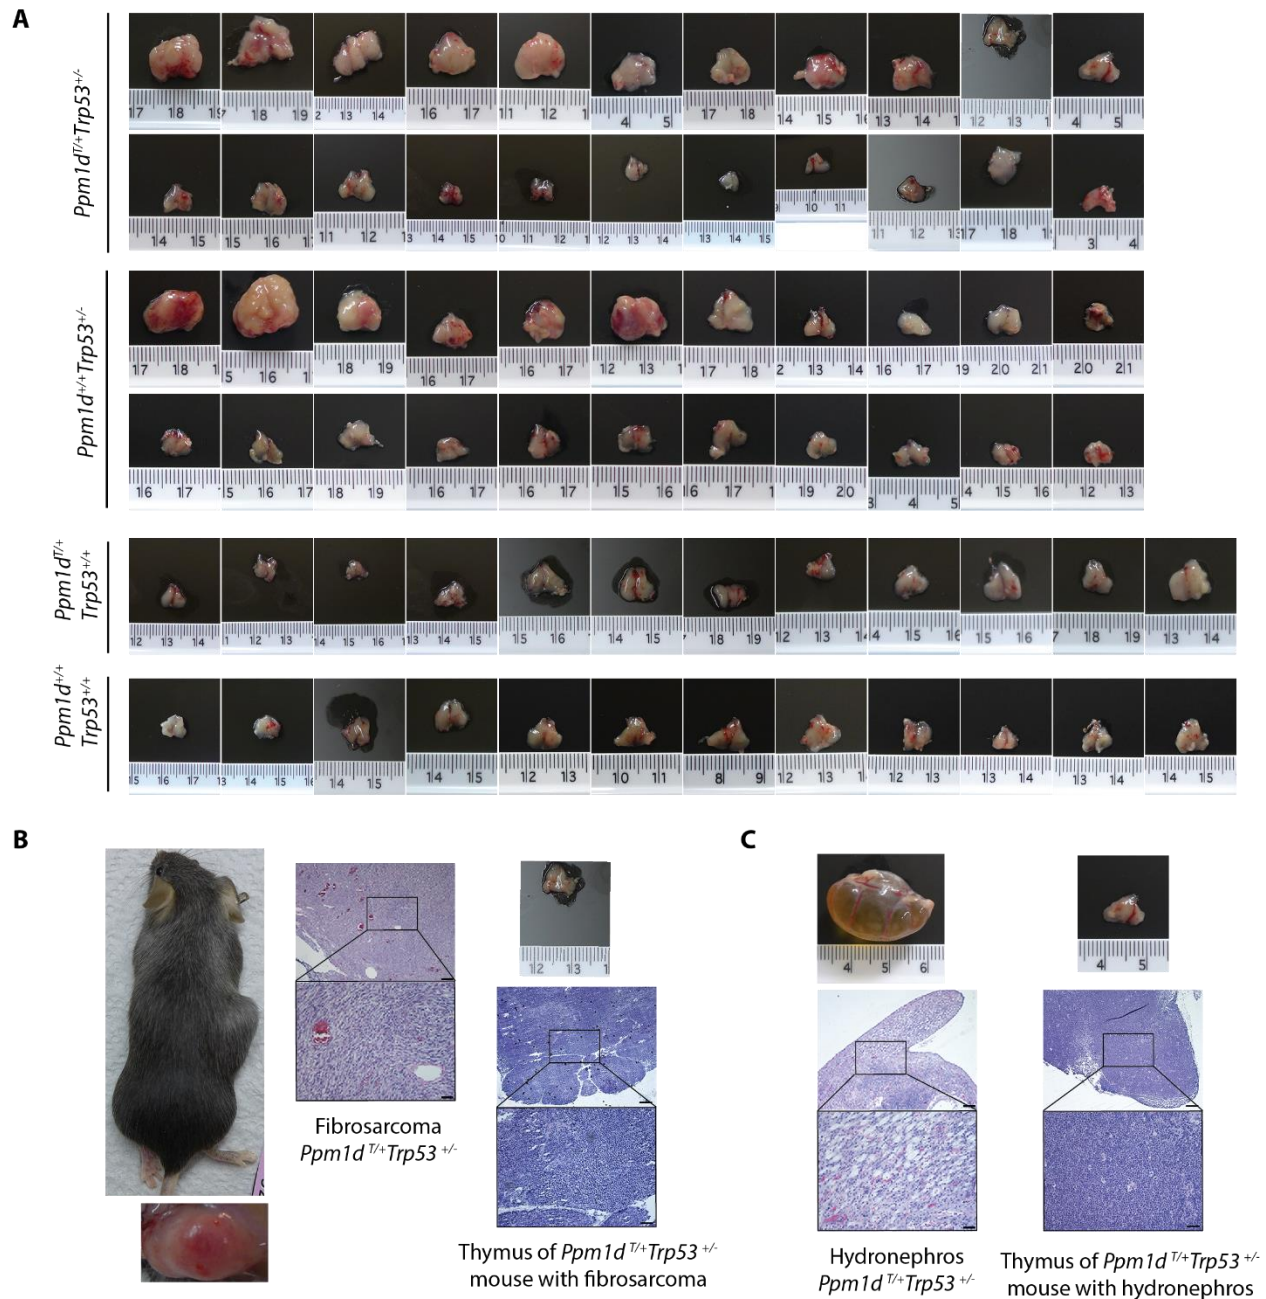

**Suppl. Figure S4. Truncated PPM1D promotes tumorigenesis in *Trp53*<sup>-/-</sup> background**

- (A) Images of thymi of mice analyzed in Figure 3. *Ppm1d<sup>T/+</sup>Trp53<sup>-/-</sup>* (N=22); *Ppm1d<sup>+/+</sup>Trp53<sup>-/-</sup>* (N=22); *Ppm1d<sup>+/+</sup>Trp53<sup>-/-</sup>* (N=12); *Ppm1d<sup>+/+</sup>Trp53<sup>+/+</sup>* (N=12).
- (B) Image of the *Ppm1d<sup>+/+</sup>Trp53<sup>-/-</sup>* mouse from Fig. 3 carrying a fibrosarcoma (left). Tumor (middle) and thymus (right) were stained by H&E. Scale bars 200  $\mu$ m (upper panels) and 50  $\mu$ m (lower panels).
- (C) Image of the *Ppm1d<sup>+/+</sup>Trp53<sup>-/-</sup>* mouse from Fig. 3 carrying a hydronephros. Tumor (left) and thymus (right) were stained by H&E. Note impaired medulla/cortex delineation in the thymus. Scale bar 200  $\mu$ m (upper panel) and 50  $\mu$ m (lower panel).
